# Supplementary material for: The Incidence and Impact of In-Hospital Bleeding in Patients with Acute Coronary Syndrome during the COVID-19 Pandemic
Source: MDPI journal article supplement (doi:10.3390/jcm11102926), 2022-05-22
Supplement: s1 [file s1]

**Supplementary Table S1:** Baseline characteristics of patients admitted for acute coronary syndrome before and during COVID-19 pandemic.

|                                          | Before COVID-19 Pandemic (n = 2142) | During COVID-19 Pandemic (n = 709) | P                |
|------------------------------------------|-------------------------------------|------------------------------------|------------------|
| Age                                      | 67±12,47                            | 67±11,862                          | 0,805            |
| BMI (kg/m <sup>2</sup> )                 | 26±4                                | 26±4                               | 0,74             |
| Female Sex                               | 26,10%                              | 26,00%                             | 0,933            |
| Hypertension                             | 69,20%                              | 69,60%                             | 0,833            |
| Diabetes Mellitus                        | 27,70%                              | 28,80%                             | 0,57             |
| Dyslipidemia                             | 50,20%                              | 50,10%                             | 0,939            |
| Smoking                                  | 27,90%                              | 30,60%                             | 0,165            |
| Ex-Smoking                               | 18,20%                              | 14,00%                             | <b>0,012</b>     |
| Atrial Fibrillation (All Forms)          | 9,60%                               | 8,80%                              | 0,514            |
| History Of Heart Failure                 | 5,20%                               | 4,90%                              | 0,794            |
| Valve Disease (more than mild)           | 0,40%                               | 0%                                 | <b>0,012</b>     |
| COPD                                     | 8,10%                               | 8,20%                              | 0,899            |
| Respiratory/Pulmonary Disease            | 0,50%                               | 0,40%                              | 0,765            |
| Neurological Disease                     | 0,60%                               | 0,60%                              | 0,99             |
| Chronic Kidney Disease (GFR < 60 ml/min) | 11,50%                              | 13,20%                             | 0,225            |
| Hemorrhagic Diatesis                     | 1,10%                               | 0%                                 | <b>0,005</b>     |
| Thrombosis Diatesis (PVT)                | 1,20%                               | 0,40%                              | 0,082            |
| Anemia                                   | 0,50%                               | 0,30%                              | 0,51             |
| Inflammatory/Infective Disease           | 1,80%                               | 1,10%                              | 0,237            |
| Previous Oncological Disease             | 1,40%                               | 0,60%                              | 0,075            |
| Previous PCI                             | 22,60%                              | 21,80%                             | 0,672            |
| Previous CABG                            | 5,60%                               | 4,80%                              | 0,429            |
| Previous MI                              | 20,40%                              | 19,10%                             | 0,463            |
| Previous Stroke/TIA                      | 4,30%                               | 4,50%                              | 0,833            |
| Atypical Symptoms                        | 13,40%                              | 14,90%                             | 0,312            |
| Dyspnea                                  | 13,10%                              | 13,40%                             | 0,842            |
| Fever                                    | 1,70%                               | 5,10%                              | <b>&lt;0,001</b> |
| Heart Failure (at the presentation)      | 13,00%                              | 12,50%                             | 0,717            |
| Killip Class > 1                         | 28,60%                              | 37,50%                             | <b>&lt;0,001</b> |
| EF (%; at presentation)                  | 48,6±9,8                            | 47,1±9,9                           | <b>0,001</b>     |
| Cardiac Arrest before Cathlab            | 3,50%                               | 3,00%                              | 0,456            |
| STEMI                                    | 43,30%                              | 47,20%                             | 0,065            |
| NSTEMI                                   | 39,30%                              | 38,10%                             | 0,576            |
| Unstable Angina                          | 12,90%                              | 9,60%                              | <b>0,02</b>      |
| Total Thrombotic occlusion               | 37,40%                              | 37,70%                             | 0,919            |
| Thrombus Aspiration                      | 17,30%                              | 14,50%                             | 0,08             |
| Number of stent implanted                | 0,82±0,39                           | 0,80±0,45                          | 0,49             |
| Fibrinolysis                             | 0,30%                               | 0%                                 | 0,167            |

|                         |        |       |       |
|-------------------------|--------|-------|-------|
| GP IIB/IIIA use         | 11,00% | 9,40% | 0,216 |
| Any Ventricular Support | 0,1%   | 0,6%  | 0.004 |

BMI= body mass index; COPD=chronic obstructive pulmonary disease ;PCI= percutaneous coronary intervention ;CABG= coronary artery bypass graft; MI=myocardial infarction; TIA=transient ischemic attack; EF=ejection fraction; STEMI=ST-segment elevated myocardial infarction; NSTEMI= non ST-segment elevated myocardial infarction; GP= glycoprotein.

**Supplementary Table S2:** Baseline characteristics of patients admitted for acute coronary syndrome during the COVID-19 pandemic first wave with positive and negative COVID-19 swab.

|                                     | Negative COVID-19 swab (n = 639) | Negative COVID-19 swab (n = 70) | P      |
|-------------------------------------|----------------------------------|---------------------------------|--------|
| Age                                 | 67±12                            | 68±12                           | 0,34   |
| BMI (kg/m2)                         | 27±4                             | 24±4                            | <0,001 |
| Female Sex                          | 26,30%                           | 22,90%                          | 0,534  |
| Hypertension                        | 70,10%                           | 65,70%                          | 0,451  |
| Diabetes Mellitus                   | 27,40%                           | 41,40%                          | 0,014  |
| Dyslipidemia                        | 51,50%                           | 37,10%                          | 0,023  |
| Smoking                             | 32,10%                           | 17,10%                          | 0,01   |
| Ex-Smoking                          | 14,10%                           | 13,00%                          | 0,807  |
| Atrial Fibrillation (all forms)     | 8,60%                            | 10,10%                          | 0,669  |
| History of Heart Failure            | 4,60%                            | 7,20%                           | 0,341  |
| COPD                                | 8,30%                            | 7,10%                           | 0,728  |
| Respiratory/Pulmonary Disease       | 0,50%                            | 0,00%                           | 0,566  |
| Neurological Disease                | 0,50%                            | 1,40%                           | 0,309  |
| Chronic Kidney Disease              | 12,60%                           | 18,60%                          | 0,161  |
| Thrombosis Diatesis (PVT)           | 0,50%                            | 0,00%                           | 0,566  |
| Anemia                              | 0,20%                            | 1,40%                           | 0,057  |
| Inflammatory/Infective Disease      | 1,30%                            | 0,00%                           | 0,346  |
| Previous Oncological Disease        | 0,50%                            | 1,40%                           | 0,309  |
| Previous PCI                        | 22,40%                           | 17,10%                          | 0,316  |
| Previous CABG                       | 4,10%                            | 11,40%                          | 0,007  |
| Previous MI                         | 20,00%                           | 11,40%                          | 0,084  |
| Previous Stroke/TIA                 | 4,30%                            | 7,10%                           | 0,27   |
| Atypical symptoms                   | 14,80%                           | 15,90%                          | 0,798  |
| Dyspnea                             | 12,10%                           | 24,60%                          | 0,004  |
| Fever                               | 3,20%                            | 22,10%                          | <0,001 |
| Heart Failure (at the presentation) | 11,80%                           | 18,80%                          | 0,092  |
| Killip Class > 1                    | 36,60%                           | 45,70%                          | 0,136  |
| EF (%; at presentation)             | 48±10                            | 44±6                            | 0,006  |
| Cardiac arrest before Cathlab       | 2,80%                            | 4,30%                           | 0,491  |
| STEMI                               | 44,90%                           | 68,60%                          | <0,001 |
| NSTEMI                              | 40,40%                           | 17,10%                          | <0,001 |
| Unstable Angina                     | 10,20%                           | 4,30%                           | 0,112  |
| MINOCA                              | 3,30%                            | 4,30%                           | 0,661  |

|                                           |          |           |        |
|-------------------------------------------|----------|-----------|--------|
| TakoTsubo Syndrome                        | 1,70%    | 7,10%     | 0,004  |
| Total Thrombotic occlusion                | 35,40%   | 58,00%    | <0,001 |
| Thrombus Aspiration                       | 14,80%   | 11,60%    | 0,472  |
| Number of stent implanted                 | 0,8±0,45 | 0,84±0,47 | 0,488  |
| GP IIB/IIIA use                           | 9,6%     | 7,2%      | 0,523  |
| Any Ventricular Support                   | 0,50%    | 1,40%     | 0,309  |
| Arrhythmic complications during procedure | 3,80%    | 11,60%    | 0,003  |
| Intra-hospital Arrhythmic Complications   | 3,20%    | 1,40%     | 0,424  |
| Intra-hospital Mechanical Complications   | 0,80%    | 2,90%     | 0,094  |
| Intra-hospital TIMI Major bleeding        | 0,90%    | 0,00%     | 0,421  |
| Intra-hospital TIMI Minor bleeding        | 2,50%    | 4,40%     | 0,36   |
| Total Bleeding                            | 3,40%    | 4,30%     | 0,717  |
| Deaths during hospitalization             | 1,60%    | 7,10%     | 0,002  |

BMI= body mass index; COPD=chronic obstructive pulmonary disease ;PCI= percutaneous coronary intervention ;CABG= coronary artery bypass graft; MI=myocardial infarction; TIA=transient ischemic attack; EF=ejection fraction; STEMI=ST-segment elevated myocardial infarction; NSTEMI= non ST-segment elevated myocardial infarction; GP= glycoprotein.

**Supplementary Table S3:** Baseline characteristics of the population with or without in-hospital bleeding based on COVID-19 swab result.

|                                | Negative COVID-19 swab<br>(n = 639) |         |       | Positive COVID-19 swab<br>(n = 70) |         |      |
|--------------------------------|-------------------------------------|---------|-------|------------------------------------|---------|------|
|                                | No Bleed                            | Bleed   | P     | No Bleed                           | Bleed   | P    |
| Age                            | 66.8±12.3                           | 69±12.9 | 0,21  | 68.1±12.3                          | 70.3±4  | 0,24 |
| BMI (kg/m2)                    | 26 ± 4                              | 27 ± 4  | 0.77  | 24 ± 4                             | 24 ± 2  | 0.93 |
| Female Sex                     | 25,70%                              | 42,90%  | 0.08  | 23,90%                             | 0,00%   | 0.33 |
| Hypertension                   | 69,70%                              | 81,00%  | 0.27  | 64,20%                             | 100,00% | 0.20 |
| Diabetes mellitus              | 27,40%                              | 28,60%  | 0.90  | 41,80%                             | 33,30%  | 0.77 |
| Dyslipidemia                   | 52,10%                              | 33,30%  | 0.09  | 35,80%                             | 66,70%  | 0.30 |
| Smoking                        | 32,20%                              | 28,60%  | 0.72  | 17,90%                             | 0,00%   | 0.42 |
| Ex-smoking                     | 14,30%                              | 9,50%   | 0.54  | 12,10%                             | 33,30%  | 0.28 |
| Atrial Fibrillation            | 8,40%                               | 14,30%  | 0.34  | 9,10%                              | 33,30%  | 0.17 |
| History of Heart Failure       | 4,50%                               | 9,50%   | 0.28  | 6,10%                              | 33,30%  | 0.07 |
| Vascular diseases              | 1,30%                               | 9,50%   | 0.003 | 0,00%                              | 0,00%   | NA   |
| COPD                           | 8,30%                               | 9,50%   | 0.84  | 7,50%                              | 0,00%   | 0.62 |
| Respiratory/Pulmonary disease  | 0,50%                               | 0,00%   | 0.75  | 0,00%                              | 0,00%   |      |
| Chronic kidney disease         | 12,20%                              | 23,80%  | 0.11  | 17,90%                             | 33,30%  | 0.50 |
| Thrombotic diathesis           | 0,50%                               | 0,00%   | 0.75  | 0,00%                              | 0,00%   |      |
| Anemia                         | 0,20%                               | 0,00%   | 0.85  | 1,50%                              | 0,00%   | 0.83 |
| Inflammatory/Infective disease | 1,30%                               | 0,00%   | 0.60  | 0,00%                              | 0,00%   |      |
| Previous oncological disease   | 0,30%                               | 4,80%   | 0.003 | 1,50%                              | 0,00%   | 0.83 |

|                                             |             |             |       |             |             |      |
|---------------------------------------------|-------------|-------------|-------|-------------|-------------|------|
| Previous PCI                                | 22,60%      | 14,30%      | 0.36  | 16,40%      | 33,30%      | 0.45 |
| Previous CABG                               | 3,90%       | 9,50%       | 0.20  | 10,40%      | 33,30%      | 0.22 |
| Previous MI                                 | 20,20%      | 14,30%      | 0.50  | 10,40%      | 33,30%      | 0.22 |
| Previous Stroke/TIA                         | 4,40%       | 0,00%       | 0.32  | 7,50%       | 0,00%       | 0.62 |
| Typical symptoms                            | 74,10%      | 81,00%      | 0.48  | 78,80%      | 66,70%      | 0.62 |
| Atypical symptoms                           | 14,80%      | 14,30%      | 0.95  | 15,20%      | 33,30%      | 0.40 |
| Intermittent Angina                         | 13,70%      | 9,50%       | 0.58  | 13,60%      | 0,00%       | 0.49 |
| Dyspnea                                     | 12,20%      | 9,50%       | 0.71  | 22,70%      | 66,70%      | 0.08 |
| Respiratory impairment                      | 6,00%       | 0,00%       | 0.25  | 15,20%      | 66,70%      | 0.02 |
| Fever                                       | 3,20%       | 4,80%       | 0.68  | 21,50%      | 33,30%      | 0.63 |
| Heart Failure (at the presentation)         | 11,70%      | 14,30%      | 0.71  | 19,70%      | 0,00%       | 0.07 |
| Killip Class (at presentation) > 1          | 98,10%      | 100,00%     | 0.16  | 100,00%     | 100,00%     | 0.74 |
| Night Presentation                          | 20,50%      | 14,30%      | 0.49  | 19,40%      | 0,00%       | 0.40 |
| EF (%; at presentation)                     | 48 ± 10     | 41 ± 9      | 0.005 | 44 ± 6      | 52 ± 5      | 0.09 |
| Time Door to Balloon (minutes)              | 257 ± 609   | 150 ± 351   | 0.48  | 34 ± 49     | 35 ± 7      | 0.98 |
| Time Symptoms to Cath-lab door (minutes)    | 1360 ± 3808 | 651 ± 967   | 0.44  | 579 ± 2622  | 827 ± 1363  | 0.87 |
| Time Symptoms to Emergency call (minutes)   | 875 ± 2806  | 925 ± 1944  | 0.94  | 428 ± 1438  | 30          | 0.78 |
| Cardiac arrest before cathlab               | 2,60%       | 9,50%       | 0.06  | 4,50%       | 0,00%       | 0.71 |
| STEMI                                       | 44,30%      | 61,90%      | 0.11  | 70,10%      | 33,30%      | 0.18 |
| NSTEMI                                      | 40,80%      | 28,60%      | 0.26  | 14,90%      | 66,70%      | 0.02 |
| Unstable Angina                             | 10,20%      | 9,50%       | 0.92  | 4,50%       | 0,00%       | 0.71 |
| Thrombotic occlusion                        | 34,90%      | 50,00%      | 0.16  | 59,10%      | 33,30%      | 0.37 |
| Number of stents implanted                  | 0,80 + 0,45 | 0,86 + 0,48 | 0.56  | 0.85 + 0.45 | 0.67 + 0.57 | 0.79 |
| GP IIB/IIIA use                             | 9,90%       | 0,00%       | 0.13  | 7,60%       | 0,00%       | 0.62 |
| Thrombus Aspiration                         | 15,00%      | 9,50%       | 0.49  | 12,10%      | 0,00%       | 0.52 |
| Any Ventricular Support                     | 2,80%       | 9,50%       | 0.21  | 7,50%       | 0,00%       | 0.89 |
| Mechanical Complications (Intra-Procedural) | 2,50%       | 14,30%      | 0.001 | 1,50%       | 0,00%       | 0.83 |

BMI= body mass index; COPD=chronic obstructive pulmonary disease ;PCI= percutaneous coronary intervention ;CABG= coronary artery bypass graft; MI=myocardial infarction; TIA=transient ischemic attack; EF=ejection fraction; STEMI=ST-segment elevated myocardial infarction; NSTEMI= non ST-segment elevated myocardial infarction; GP= glycoprotein.

**Supplementary Table S4:** Univariate analysis for TIMI major or minor bleeding.

|     | Hazard ratio (95% CI) |       |       | P value |
|-----|-----------------------|-------|-------|---------|
|     |                       | Lower | Upper |         |
| Age | 1.013                 | 0.995 | 1.03  | 0.159   |

|                                                   |       |       |        |         |
|---------------------------------------------------|-------|-------|--------|---------|
| Female gender                                     | 1.892 | 1.226 | 2.921  | 0.004   |
| Hypertension                                      | 1.15  | 0.718 | 1.843  | 0.561   |
| Diabetes mellitus                                 | 0.956 | 0.596 | 1.534  | 0.853   |
| Dyslipidemia                                      | 0.617 | 0.398 | 0.956  | 0.031   |
| Previous PCI                                      | 1.122 | 0.68  | 1.851  | 0.652   |
| Previous CABG                                     | 1.09  | 0.442 | 2.689  | 0.852   |
| Previous MI                                       | 1.286 | 0.779 | 2.121  | 0.325   |
| Smoking                                           | 0.823 | 0.503 | 1.346  | 0.438   |
| Atrial Fibrillation                               | 1.549 | 0.856 | 2.804  | 0.148   |
| Heart Failure at the presentation                 | 1.24  | 0.714 | 2.154  | 0.445   |
| History of Heart Failure                          | 1.618 | 0.746 | 3.507  | 0.223   |
| Previous Stroke/TIA                               | 1.839 | 0.849 | 3.988  | 0.123   |
| COPD                                              | 1.762 | 0.956 | 3.249  | 0.069   |
| Chronic kidney disease                            | 2.133 | 1.292 | 3.523  | 0.003   |
| Anemia                                            | 6.595 | 2.075 | 20.963 | 0.001   |
| Peripheral vascular diseases                      | 2.786 | 1.018 | 7.629  | 0.046   |
| Valve disease                                     | 6.073 | 1.482 | 24.882 | 0.012   |
| Respiratory/Pulmonary disease                     | 1.895 | 0.263 | 13.673 | 0.526   |
| Inflammatory/Infective disease                    | 0.653 | 0.091 | 4.691  | 0.672   |
| Thrombotic diathesis                              | 1.751 | 0.429 | 7.154  | 0.435   |
| Hemorrhagic diathesis                             | 3.602 | 1.137 | 11.416 | 0.029   |
| Previous oncological disease                      | 3.991 | 1.607 | 9.913  | 0.003   |
| Neurological disease                              | 2.926 | 0.715 | 11.981 | 0.135   |
| STEMI presentation                                | 1.003 | 0.656 | 1.534  | 0.989   |
| NSTEMI presentation                               | 1.12  | 0.728 | 1.723  | 0.605   |
| Unstable Angina presentation                      | 0.575 | 0.232 | 1.424  | 0.232   |
| MINOCA presentation                               | 1.12  | 0.354 | 3.545  | 0.847   |
| Cardiac arrest before Cathlab                     | 1.847 | 0.802 | 4.253  | 0.149   |
| Fever at presentation                             | 1.553 | 0.566 | 4.259  | 0.393   |
| Killip Class at presentation                      | 1.398 | 1.119 | 1.747  | 0.003   |
| EF (%) at presentation)                           | 0.972 | 0.952 | 0.993  | 0.011   |
| Echo Wall motion abnormalities                    | 2.46  | 1.131 | 5.35   | 0.023   |
| Number of diseased vessels                        | 0.97  | 0.862 | 1.091  | 0.607   |
| Fibrinolysis                                      | 4.585 | 0.635 | 33.115 | 0.131   |
| GP IIB/IIIA use                                   | 0.871 | 0.436 | 1.738  | 0.694   |
| Mechanical Complications in cathlab               | 5.692 | 2.729 | 11.872 | < 0.001 |
| Inotropes at presentation and/or during procedure | 1.88  | 0.988 | 3.579  | 0.054   |
| Cardiac Arrest during procedure                   | 1.226 | 0.301 | 4.993  | 0.776   |

BMI= body mass index; COPD=chronic obstructive pulmonary disease ;PCI= percutaneous coronary intervention ;CABG= coronary artery bypass graft; MI=myocardial infarction; TIA=transient ischemic attack; EF=ejection fraction; STEMI=ST-segment elevated myocardial infarction; NSTEMI= non ST-segment elevated myocardial infarction; GP= glycoprotein.

**Supplementary Table S5:** Multivariate analysis for TIMI major or minor bleeding.

|               | Hazard ratio (95% CI) |       |       | P value |
|---------------|-----------------------|-------|-------|---------|
| Female gender | 2.053                 | 1.291 | 3.266 | 0.002   |

|                                     |       |       |        |         |
|-------------------------------------|-------|-------|--------|---------|
| Dyslipidemia                        | 0.541 | 0.337 | 0.87   | 0.011   |
| Chronic kidney disease              | 1.85  | 1.089 | 3.141  | 0.023   |
| Anemia                              | 5.538 | 1.519 | 20.191 | 0.01    |
| Previous oncological disease        | 2.655 | 0.966 | 7.296  | 0.058   |
| Killip Class (at presentation)      | 1.309 | 1.038 | 1.651  | 0.023   |
| Echo Wall motion abnormalities      | 2.092 | 0.895 | 4.89   | 0.088   |
| Mechanical Complications in cathlab | 4.844 | 2.179 | 10.77  | < 0.001 |
